# Supplementary material for: A D-optimal mixture design of tomato-based sauce formulations: effects of onion and EVOO on lycopene isomerization and bioaccessibility
Source: Royal Society of Chemistry journal article supplement (doi:10.1039/c9fo00208a), 2019-01-01
Supplement: c9fo00208a1.pdf [file c9fo00208a1.pdf]

1  
2  
3  
4  
5  
6  
7  
8  
9  
10  
11  
12  
13  
14  
15  
16  
17  
18  
19  
20  
21  
22  
23

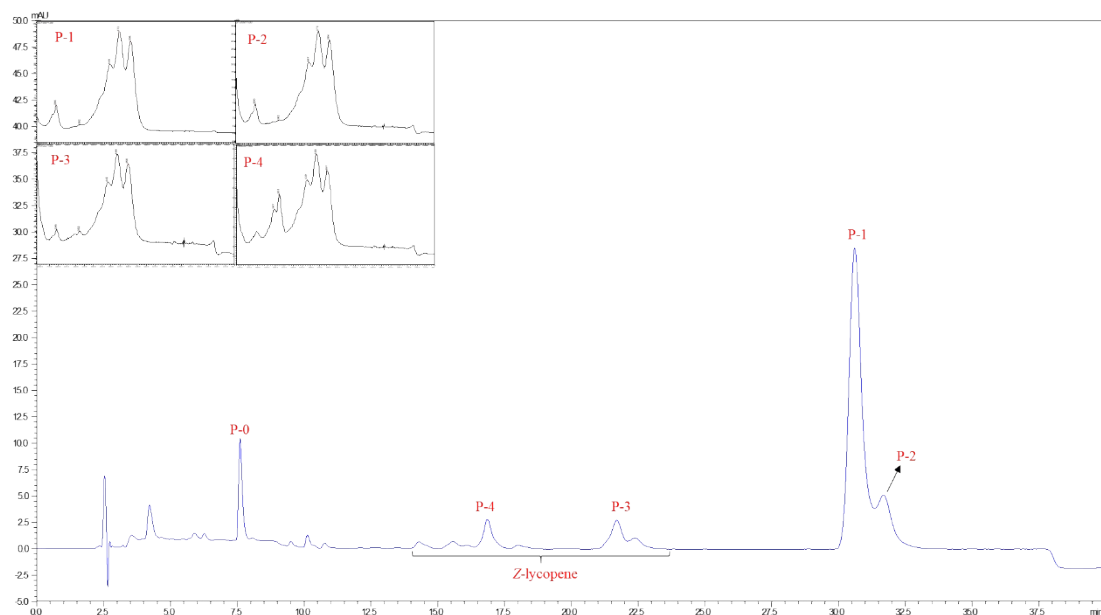

Fig. S1 Representative chromatogram of carotenoids profile at 472 nm for tomato-onion-EVOO sauces (P-0: internal standard; P-1: all-*E*-lycopene; P-2: 5-*Z*-lycopene; P-3: 9-*Z*-lycopene; P-4: 13-*Z*-lycopene)

24  
25  
26  
27  
28  
29  
30  
31  
32  
33  
34  
35  
36  
37  
38  
39  
40  
41  
42  
43  
44  
45  
46  
47  
48  
49  
50  
51  
52

Table S1. Identification of lycopene isomers.

| Peaks | Lycopene isomers | K'     | $\lambda_{\text{max}}$ (in line)(nm) | Q-ratios (inline) | Q-ratios (reported) |                   |                   |
|-------|------------------|--------|--------------------------------------|-------------------|---------------------|-------------------|-------------------|
| P-1   | all- <i>E</i> -  | 11.962 | 446,473,504                          | 0.06              | 0.12 <sup>a</sup>   | 0.06 <sup>c</sup> | n.d.              |
| P-2   | 5- <i>Z</i> -    | 12.437 | 362,447,473,504                      | 0.06              | 0.11 <sup>a</sup>   | 0.05 <sup>b</sup> | n.d.              |
| P-3   | 9- <i>Z</i> -    | 8.229  | 362,442,468,498                      | 0.13              | 0.20 <sup>a</sup>   | 0.12 <sup>b</sup> | 0.13 <sup>d</sup> |
| P-4   | 13- <i>Z</i> -   | 6.173  | 361,439,464,496                      | 0.58              | 0.52 <sup>a</sup>   | 0.55 <sup>b</sup> | 0.56 <sup>d</sup> |

K': retention index of peaks;

Q-ratio: the ratio of absorption intensity ( $D_B$ ) at the near-UV maxima (36 to 362 nm) to absorption intensity ( $D_H$ ) at the main absorption maximum (45 to 476 nm);

<sup>a, b, c, d</sup> Identified according to previous work in references (<sup>a</sup> Sun, et al. 2016; <sup>b</sup> Lin, et al. 2003; <sup>c</sup> Schierle, et al. 1997; <sup>d</sup> K. Murakami et al. 2018).

n.d.: not detected

53

54

55

56 Table S2: Experimental results of yield (%), dry weight (%) and content of lycopene isomers per dry  
57 weight of product (mg/kg DW) in HB-O-E sauce for each formulation

| RUN | Yield | Dry weight | 13-Z     | 9-Z      | 5-Z       | total-Z | all-E  | total  |
|-----|-------|------------|----------|----------|-----------|---------|--------|--------|
| 1   | 86.6  | 11.0±0.2   | 17.4±1.9 | 24.0±0.8 | 59.2±3.9  | 122±6   | 518±25 | 640±19 |
| 2   | 84.6  | 12.2±0.2   | 18.8±0.2 | 22.7±0.9 | 48.5±5.5  | 110±7   | 431±17 | 541±24 |
| 3   | 82.3  | 12.0±0.1   | 21.2±1.5 | 21.8±1.0 | 52.0±5.3  | 115±7   | 378±3  | 493±6  |
| 4   | 85.6  | 12.6±0.1   | 21.9±0.8 | 25.3±2.9 | 58.4±3.6  | 129±5   | 357±11 | 486±12 |
| 5   | 84.8  | 13.6±0.1   | 21.1±0.5 | 19.8±0.8 | 44.6±4.6  | 104±4   | 413±7  | 517±3  |
| 6   | 82.3  | 14.2±0.1   | 19.1±0.9 | 21.9±0.9 | 53.8±10.5 | 114±11  | 371±15 | 485±10 |
| 7   | 84.0  | 13.8±0.1   | 19.1±1.1 | 22.1±2.6 | 53.4±6.0  | 116±1   | 333±3  | 448±3  |
| 8   | 84.7  | 13.7±0.1   | 19.3±0.9 | 20.3±0.6 | 54.6±6.5  | 114±7   | 330±2  | 444±5  |
| 9   | 84.9  | 13.6±0.1   | 20.1±0.2 | 22.6±3.6 | 56.6±1.6  | 121±6   | 324±8  | 445±6  |
| 10  | 85.2  | 13.8±0.2   | 20.9±0.9 | 20.7±3.9 | 53.3±3.2  | 116±6   | 269±16 | 385±20 |
| 11  | 82.2  | 15.2±0.23  | 20.0±1.1 | 25.1±0.5 | 57.4±6.7  | 127±8   | 295±4  | 421±4  |
| 12  | 83.5  | 15.0±0.1   | 19.3±1.2 | 21.9±3.1 | 53.9±3.9  | 118±7   | 264±9  | 382±1  |
| 13  | 84.0  | 16.2±0.3   | 17.2±0.8 | 15.8±0.7 | 38.1±4.3  | 86±6    | 326±16 | 412±11 |
| 14  | 83.0  | 16.6±0.3   | 17.9±1.2 | 21.2±1.3 | 50.2±3.7  | 110±6   | 214±5  | 324±6  |

58 HB-O-E: hot-break tomato puree-onion puree-extra virgin olive oil

59

60

61

62

63

64

65

66

67

68

69

70

71

72

73

74

75 Table S3: Experimental results of yield (%), dry weight (%) and content of lycopene isomers per dry  
76 weight of product (mg/kg DW) in CB-O-E sauce for each formulation

| RUN | Yield | Dry weight | 13-Z     | 9-Z      | 5-Z    | total-Z | all-E   | total   |
|-----|-------|------------|----------|----------|--------|---------|---------|---------|
| 1   | 85.2  | 10.5±0.1   | 44.2±4.2 | 44.9±1.1 | 166±13 | 297±11  | 1660±60 | 1957±51 |
| 2   | 84.3  | 11.4±0.1   | 42.5±5.1 | 41.7±5.5 | 151±13 | 272±29  | 1339±41 | 1612±14 |
| 3   | 82.3  | 11.4±0.1   | 41.5±3.5 | 41.7±0.8 | 132±16 | 253±13  | 1194±42 | 1447±54 |
| 4   | 85.1  | 12.3±0.3   | 51.3±1.6 | 49.2±5.4 | 172±24 | 324±15  | 1043±26 | 1367±16 |
| 5   | 85.5  | 13.0±0.3   | 55.6±2.8 | 35.1±2.9 | 111±25 | 243±31  | 1202±13 | 1446±19 |
| 6   | 84.5  | 13.3±0.1   | 48.2±3.7 | 49.0±3.6 | 157±38 | 305±33  | 1087±4  | 1392±35 |
| 7   | 84.7  | 13.1±0.1   | 48.4±5.0 | 50.1±4.4 | 166±36 | 316±33  | 1006±15 | 1322±32 |
| 8   | 84.7  | 13.2±0.2   | 52.4±2.8 | 48.8±4.1 | 174±12 | 327±3   | 1005±48 | 1331±46 |
| 9   | 84.0  | 13.3±0.1   | 52.5±7.3 | 50.3±4.5 | 178±20 | 334±17  | 971±13  | 1304±12 |
| 10  | 83.9  | 13.4±0.2   | 49.9±2.0 | 45.5±4.0 | 149±22 | 294±15  | 853±25  | 1147±12 |
| 11  | 84.6  | 14.7±0.1   | 47.9±4.4 | 45.8±4.6 | 150±30 | 292±25  | 863±29  | 1155±11 |
| 12  | 84.2  | 14.7±0.1   | 49.2±2.4 | 45.2±5.0 | 152±15 | 295±4   | 814±23  | 1109±25 |
| 13  | 87.7  | 15.0±0.1   | 48.9±4.0 | 29.5±3.1 | 100±6  | 214±4   | 983±13  | 1197±13 |
| 14  | 85.9  | 15.7±0.5   | 51.6±2.0 | 41.6±9.0 | 164±12 | 304±17  | 640±13  | 944±20  |

77 CB-O-E: cold-break tomato puree-onion puree-extra virgin olive oil

78
